# Supplementary material
Source: PubMed Central journal article supplement (PMC6439333)
Supplement: awz021_supplementary_figures.pdf [file awz021_supplementary_figures.pdf]

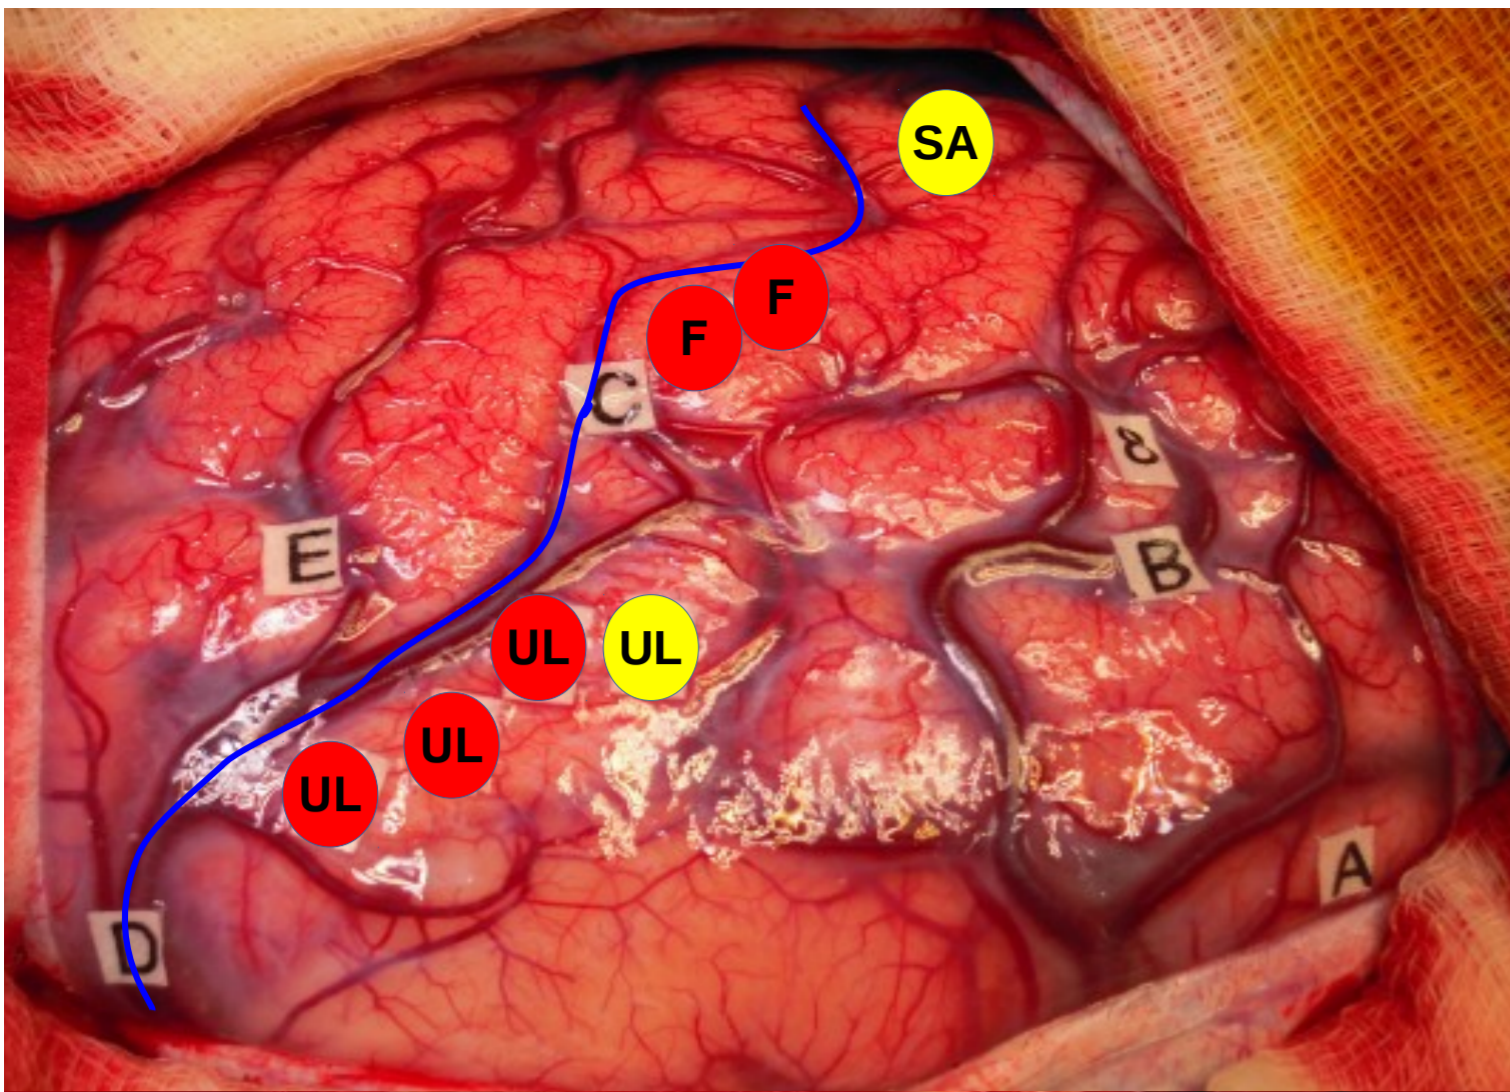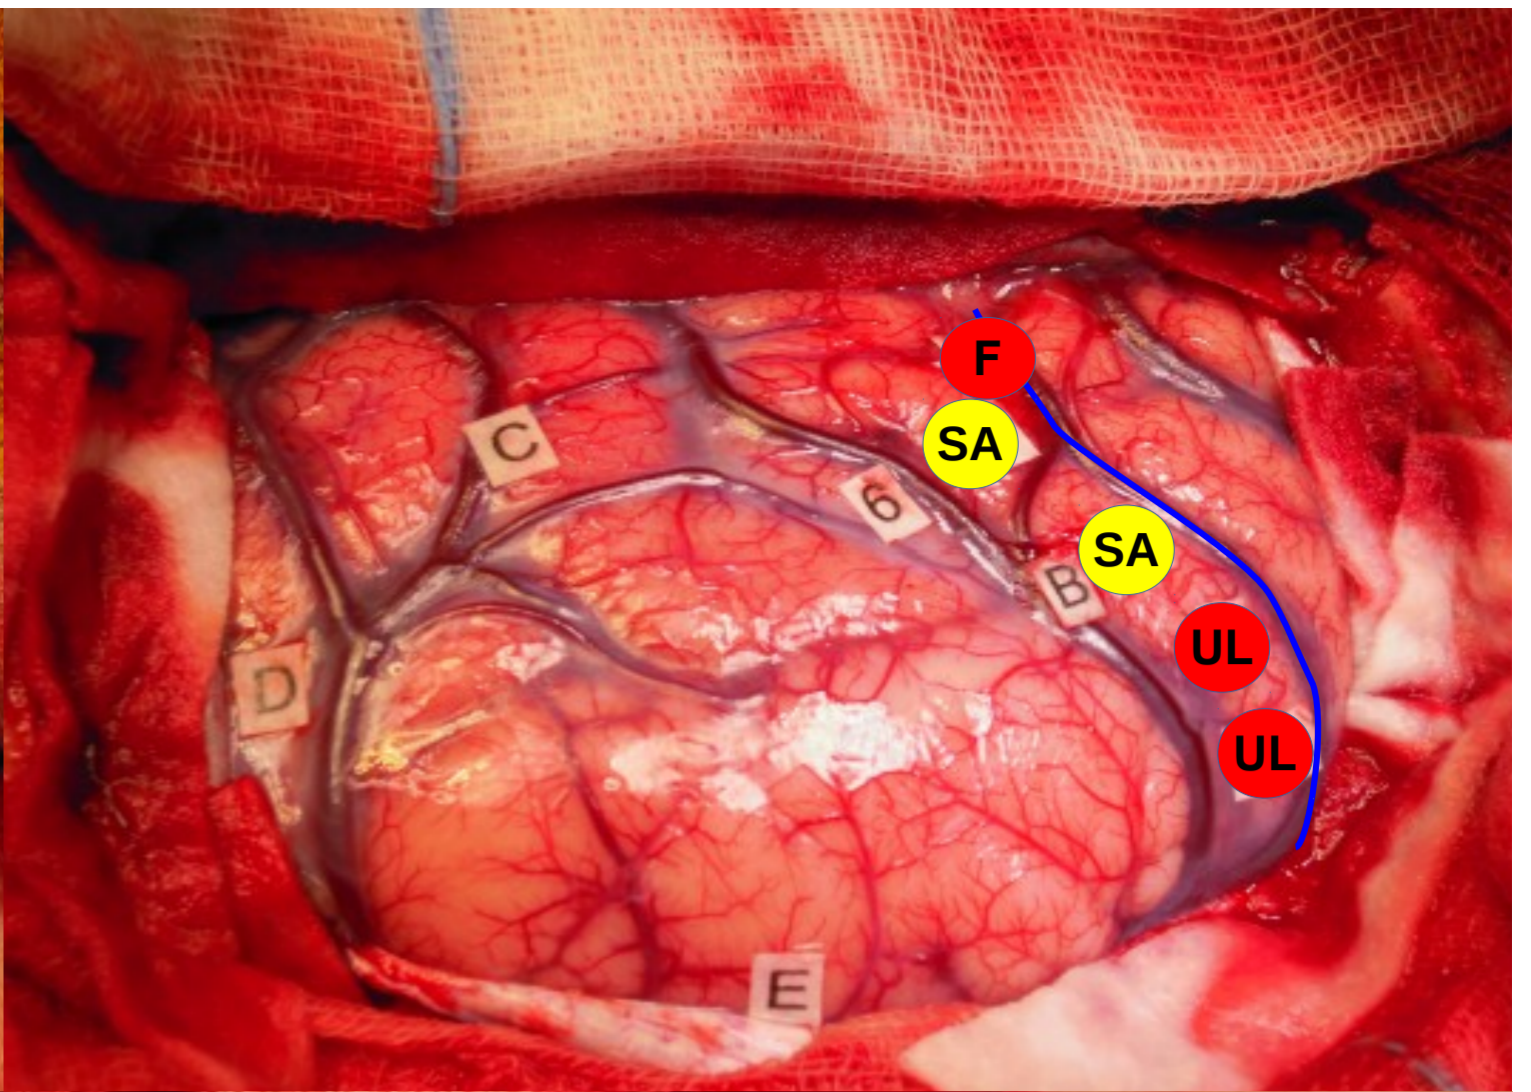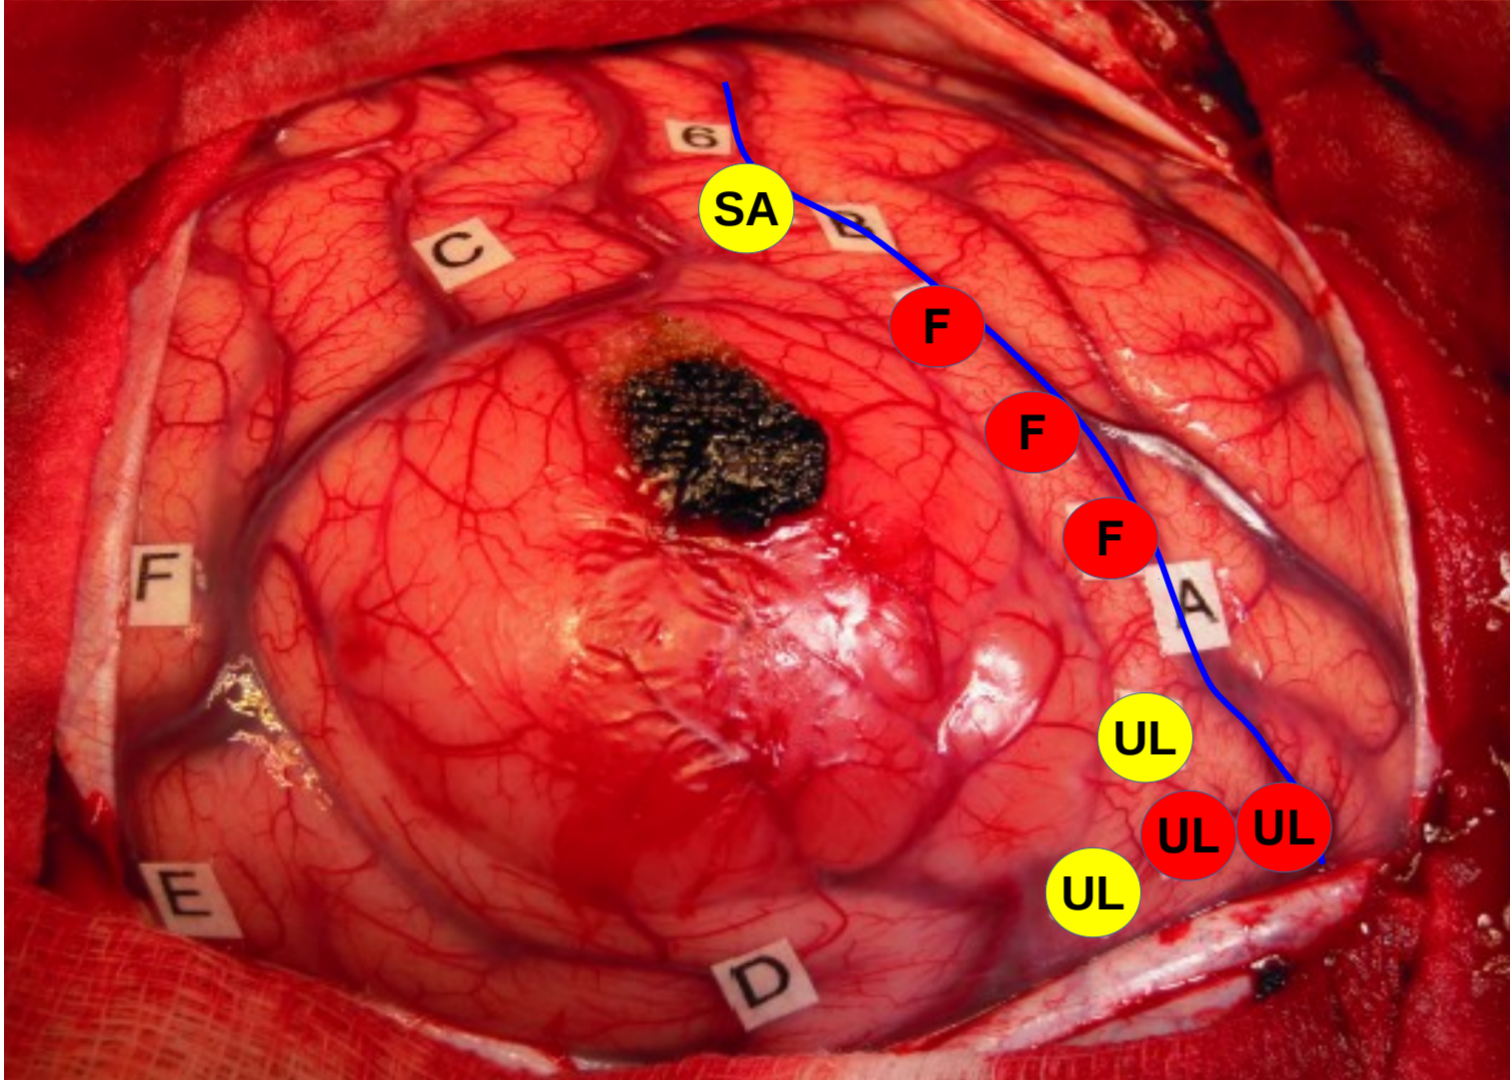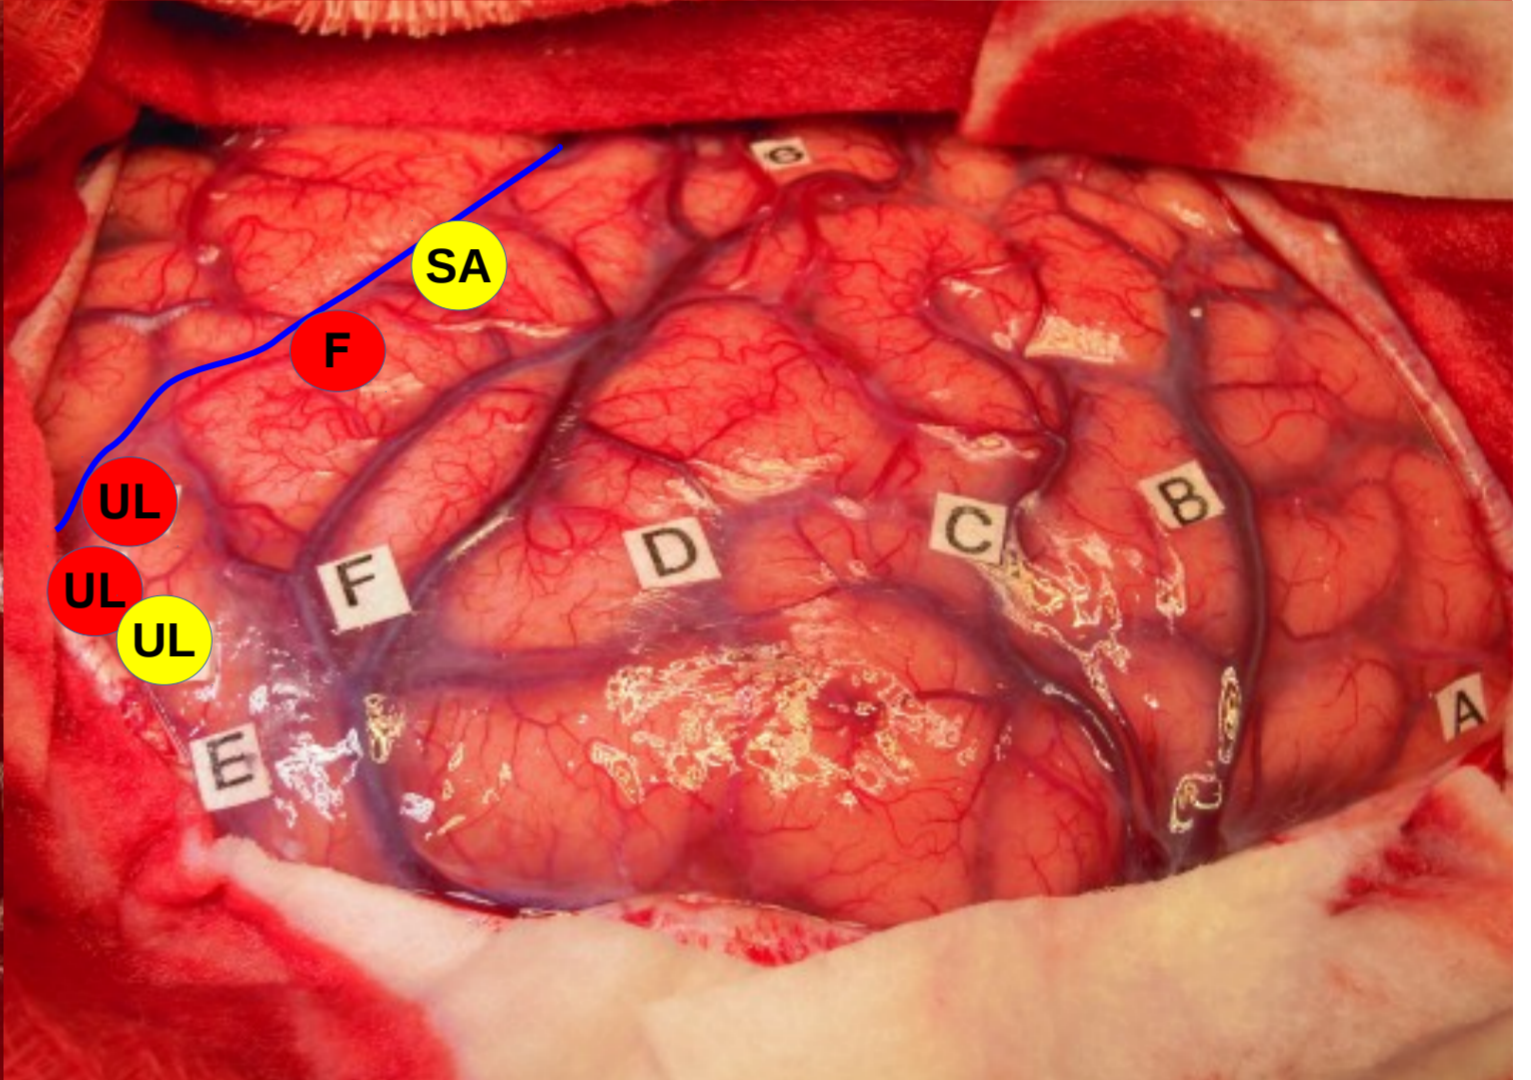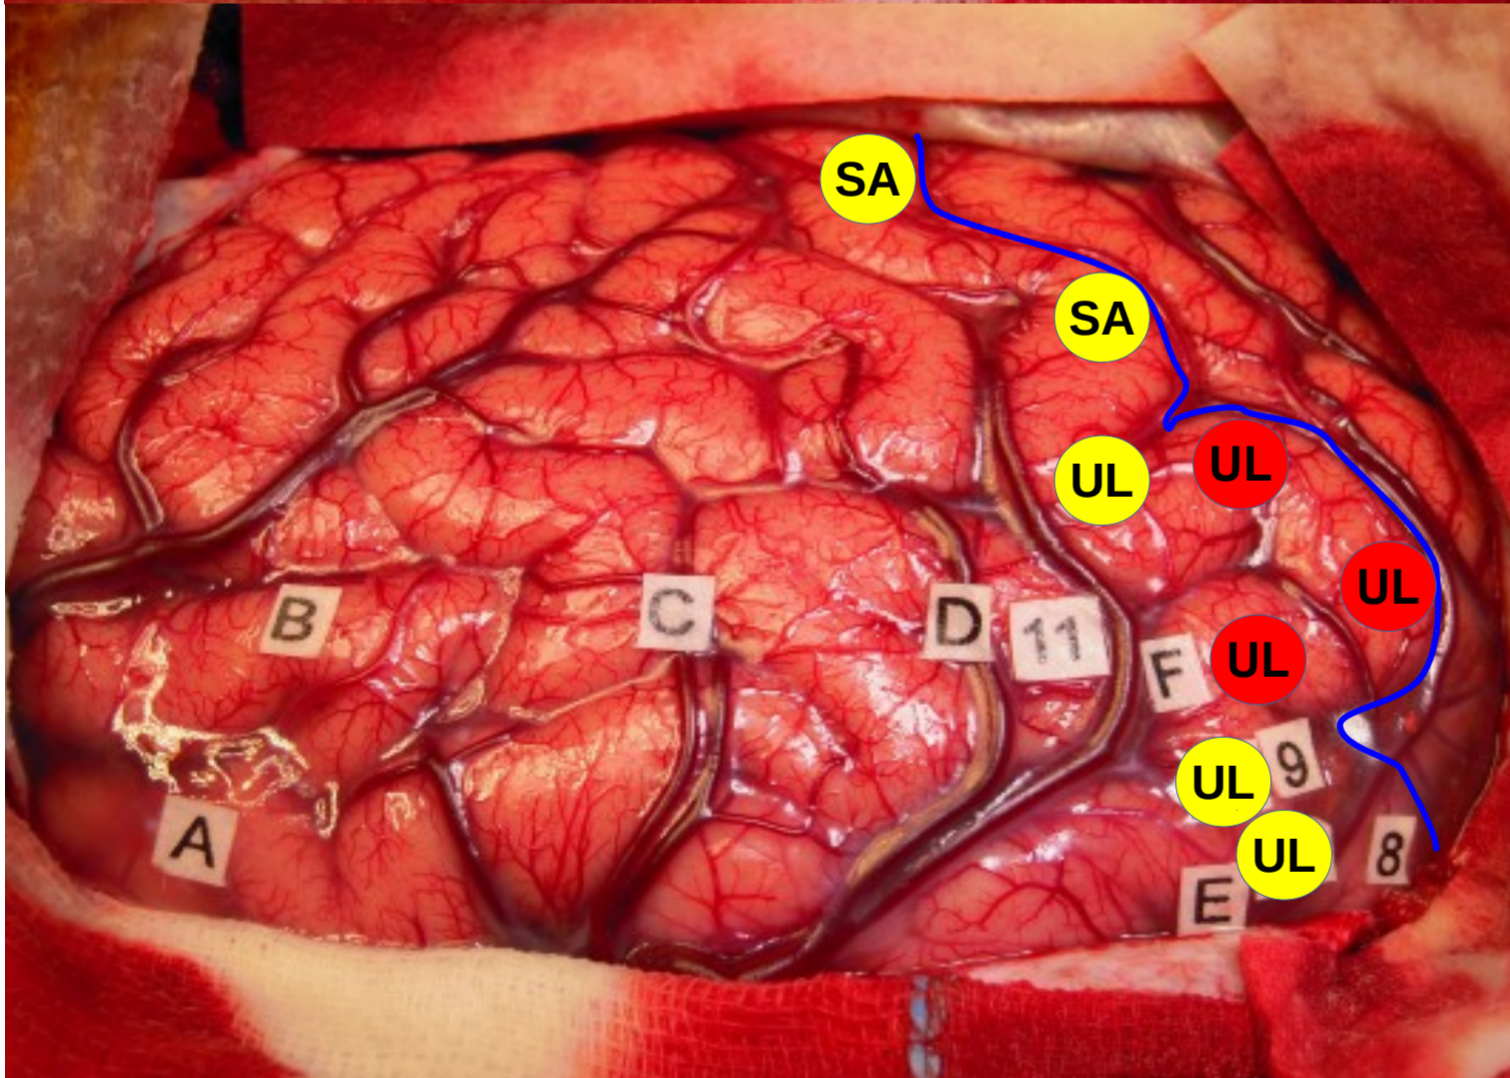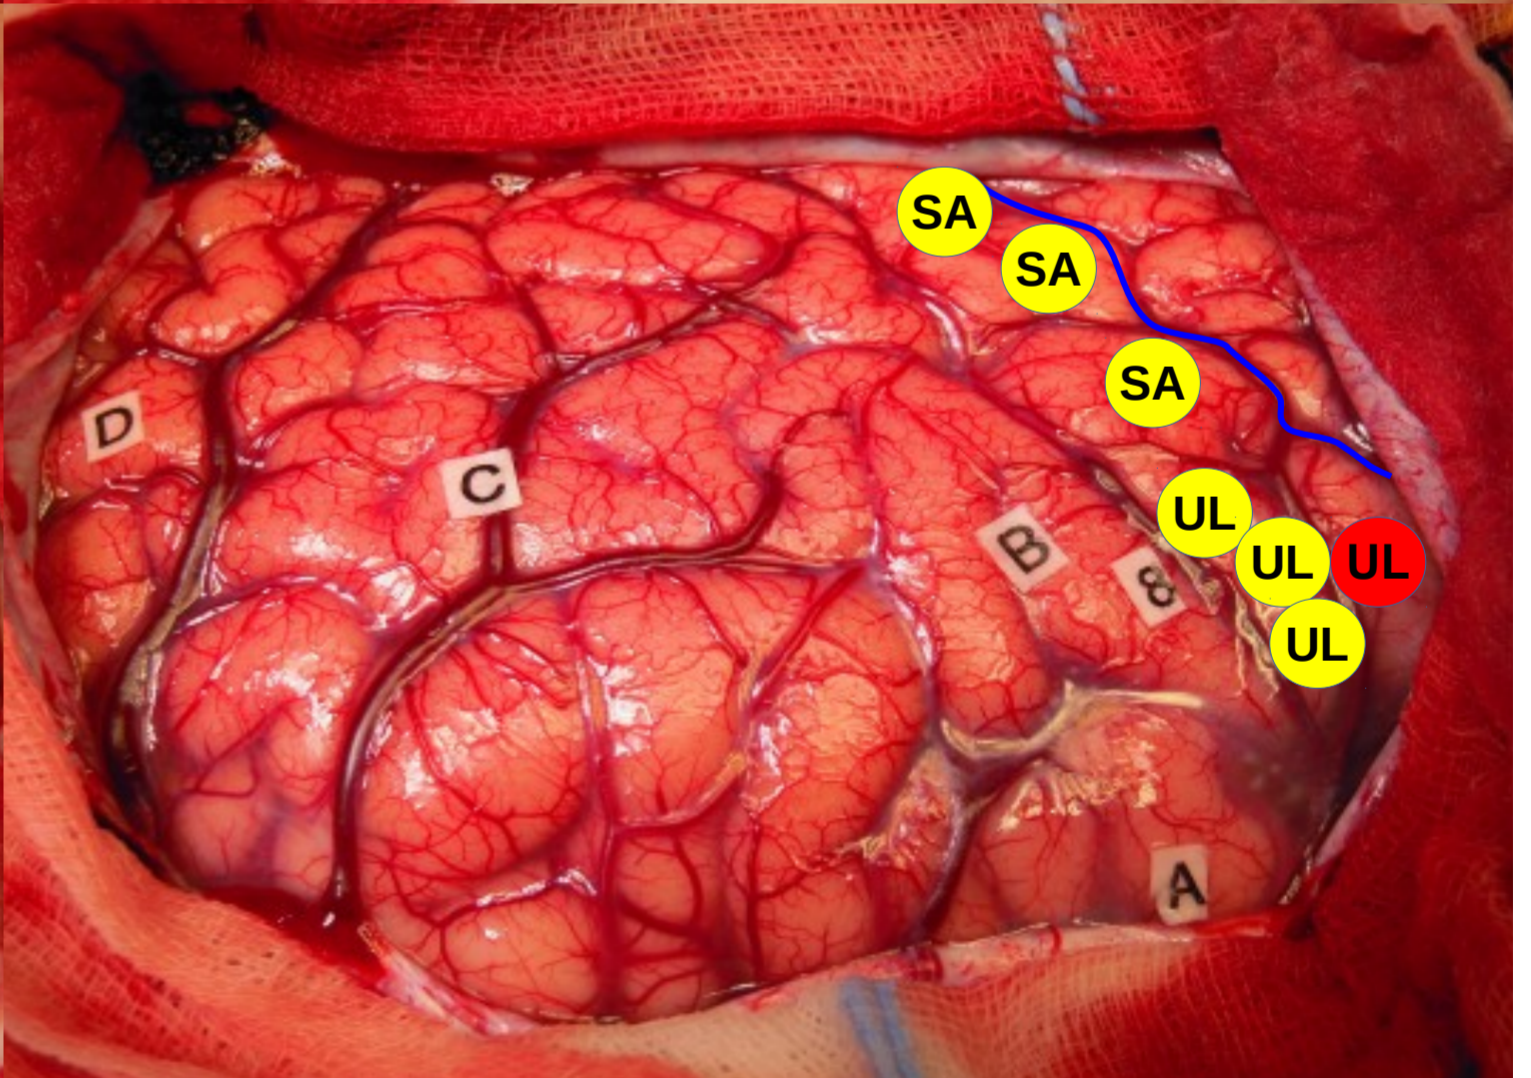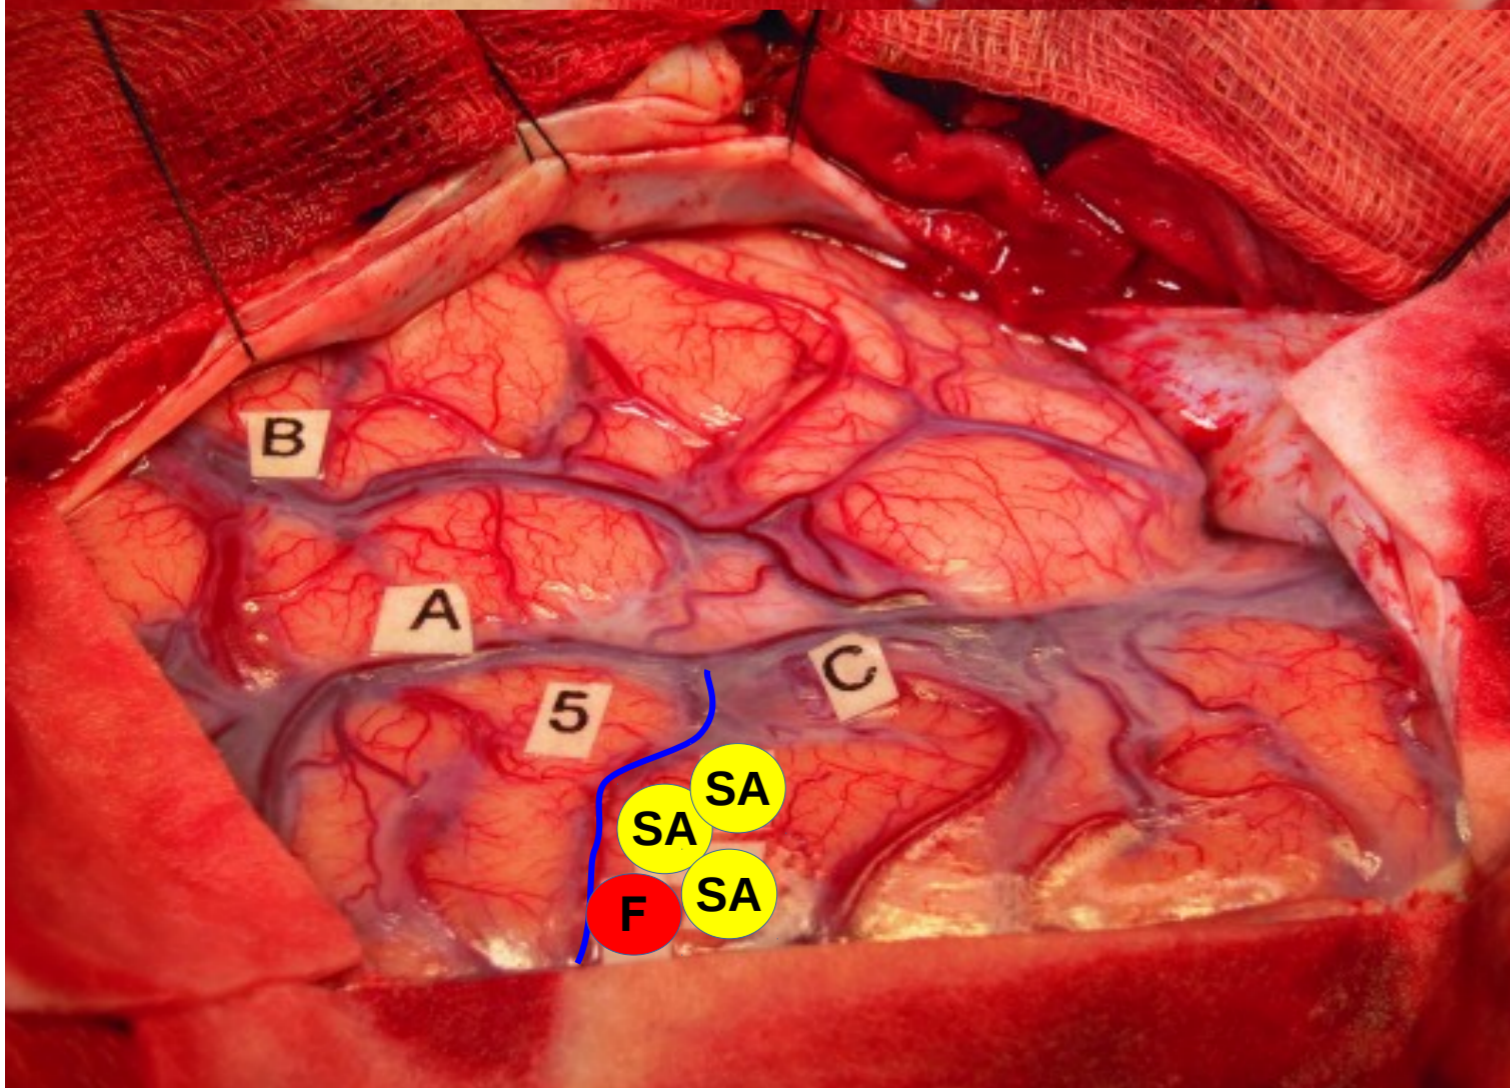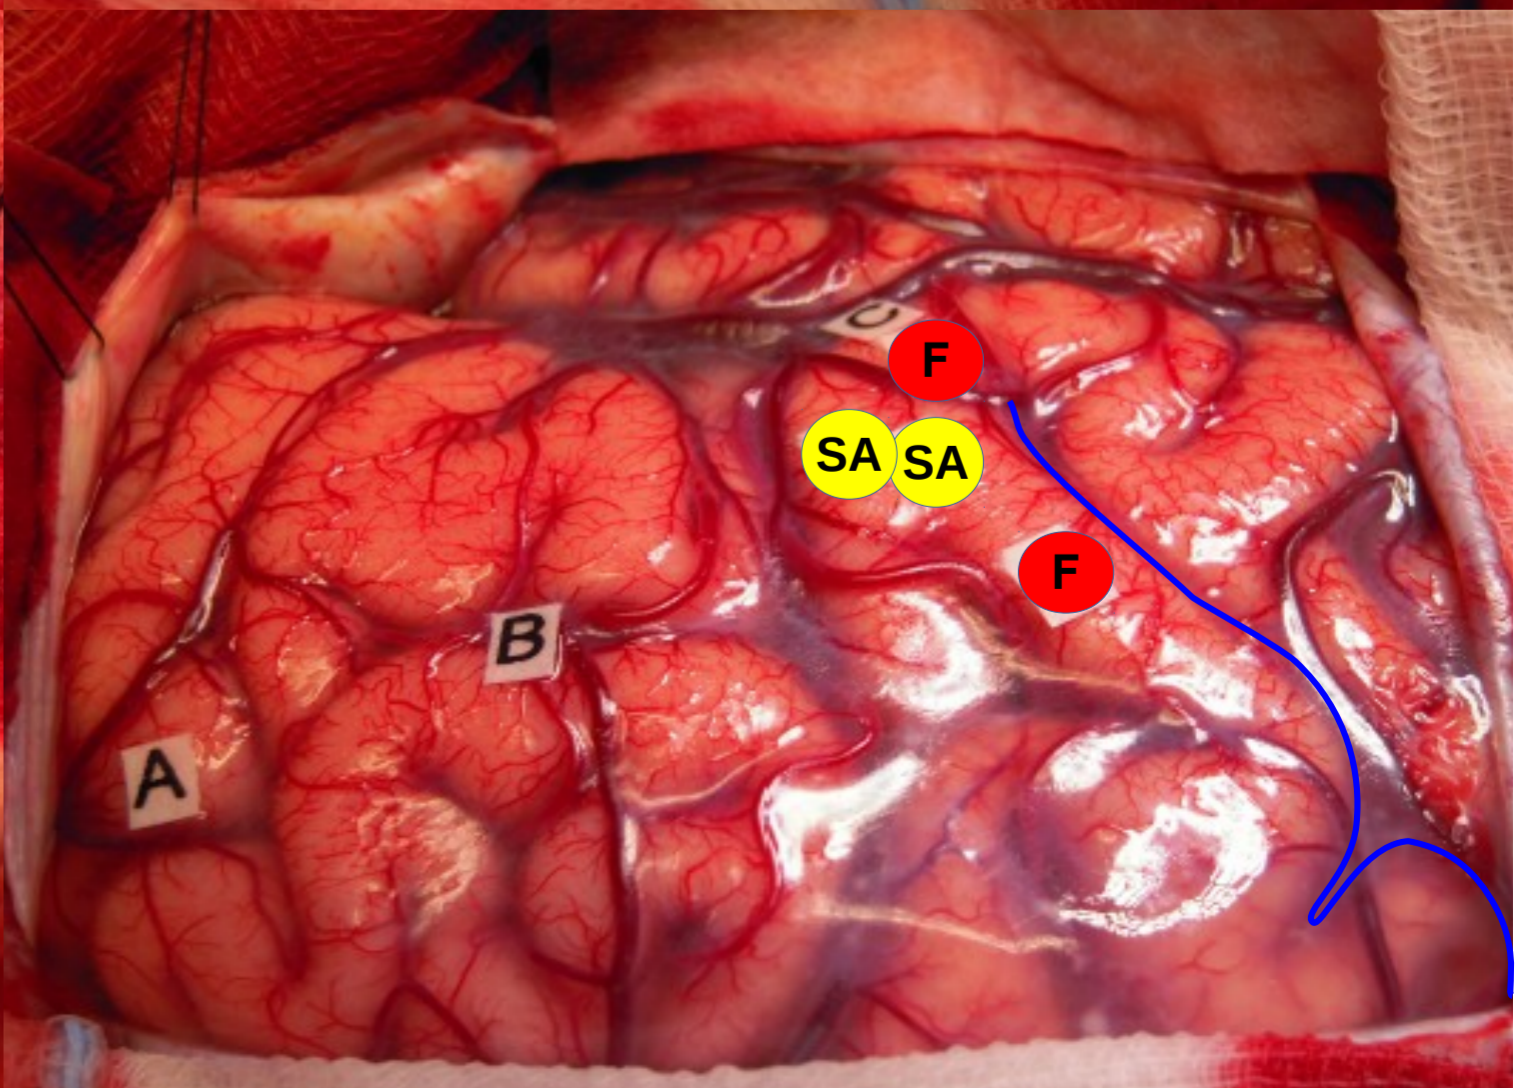



Supplementary Figure 1: Examples of the spatial distribution of NMRs and PMRs, showing the anteroposterior gradient. (*yellow circles: NMR; red circles: PMR; SA: speech arrest; F: face; UL: upper limb; blue line: central sulcus*).
