# Supplementary material
Source: PubMed Central journal article supplement (PMC6439333)
Supplement: awz021_supplementary_materials.pdf [file awz021_supplementary_materials.pdf]

## Supplementary Materials

### **Probabilistic map of negative motor areas of the upper limb and face:**

#### **A brain stimulation study**

Fabien Rech, Guillaume Herbet, Yann Gaudeau, Sophie Mézières, Jean-Marie Moureau,  
Sylvie Moritz-Gasser, Hugues Duffau

**Supplementary Table 1: Tumor location and proportion**

| Location                           | Total number | Proportion |
|------------------------------------|--------------|------------|
| Superior frontal gyrus             | 26           | 22.22%     |
| Middle frontal gyrus               | 21           | 17.95%     |
| Inferior frontal gyrus             | 14           | 11.97%     |
| Anterior cingulate gyrus           | 5            | 4.27%      |
| Frontobasal and frontopolar region | 38           | 32.48%     |
| Precentral gyrus                   | 8            | 6.84%      |
| Postcentral gyrus                  | 6            | 5.13%      |
| Temporal pole                      | 34           | 29.06%     |
| Superior temporal gyrus            | 7            | 5.98%      |
| Middle temporal gyrus              | 6            | 5.13%      |
| Inferior temporal gyrus            | 6            | 5.12%      |
| Temporo-occipital junction         | 1            | 0.85%      |
| Hippocampus                        | 7            | 5.98%      |
| Superior parietal lobule           | 3            | 2.56%      |
| Inferior parietal lobule           | 10           | 8.55%      |
| Precuneus                          | 1            | 0.85%      |
| Insula                             | 43           | 36.75%     |

**Supplementary Table 2: Gyri stimulated and proportion**

| Location                 | Total number | Proportion |
|--------------------------|--------------|------------|
| Superior frontal gyrus   | 40           | 34.19%     |
| Middle frontal gyrus     | 82           | 70.08%     |
| Pars opercularis         | 97           | 82.91%     |
| Pars triangularis        | 93           | 79.49%     |
| Pars orbitaris           | 72           | 61.54 %    |
| Precentral gyrus         | 117          | 100 %      |
| Postcentral gyrus        | 91           | 77.78 %    |
| Superior temporal gyrus  | 66           | 56.41 %    |
| Middle temporal gyrus    | 38           | 32.48 %    |
| Superior parietal lobule | 3            | 2.56 %     |
| Inferior parietal lobule | 22           | 18.80 %    |
